# Supplementary material for: B cells mediate chronic allograft rejection independently of antibody production
Source: JCI journal article supplement (doi:10.1172/jci70084), 2014-02-09
Supplement: sd1 [file 1]

## Supplemental Material

### B cells mediate chronic allograft rejection independently of antibody production

Qiang Zeng, Yue-Harn Ng, Tripti Singh, Ke Jiang, Khaleefathullah A. Sherif, Renee Ippolito, Salwa Zahalka, Qi Li, Parmjeet Randhawa, Rosemary A. Hoffman, Balathiripurasundari Ramaswami, Frances E. Lund, and Geetha Chalasani

#### Index

1. Supplemental Methods
2. Supplemental Figures (1 – 4)
3. Supplemental References

#### 1. Supplemental Methods

**Mice:** C57BL/6 (H-2<sup>b</sup>; hereafter WT, B6.129S2-Igh-6<sup>tm1Cgn</sup>/J (H-2<sup>b</sup>; hereafter  $\mu$ MT) (1), B6(C)-H2<sup>bm12</sup>/KhEgJ (H-2<sup>b</sup>-Ab1<sup>bm12</sup>; hereafter Bm12) (2, 3), C57BL/6-Tg(IghelMD4)4Ccg/J (H-2<sup>b</sup>; hereafter Ig<sup>HEL</sup>) (4) and BALB/c (H-2<sup>d</sup>) mice were purchased from The Jackson Laboratory. B6.129-H2Ab1<sup>tm1Gru</sup>B2m<sup>tm1Jae</sup> (B2m/Abb; H-2<sup>b</sup>; hereafter MHC-KO) mice were purchased from Taconic Farms. Secretary IgM (*Ighm*) deficient ( $\mu$ S KO) and Activation-Induced Deaminase (AID; *Aicda*) deficient (AID KO), double-knockout mice (H-2<sup>b</sup>; hereafter AID/ $\mu$ S KO) were obtained from Dr. Frances E. Lund (5, 6). All animals were maintained under SPF conditions and prophylactic antibiotics to prevent opportunistic infections. All procedures were performed as per IACUC guidelines.

**Bone marrow chimeras:**  $\mu$ MT mice were lethally irradiated and transplanted with a combination of syngeneic (H-2<sup>b</sup>) T and B cell depleted bone marrow cells ( $1 \times 10^7$ ) from  $\mu$ MT and WT (80% + 20%) or  $\mu$ MT and MHC-KO (80% + 20%) or  $\mu$ MT (100%) donors. All recipients were treated with anti-NK1.1 (200 $\mu$ g on day -1 and day -2) (PK136, Bioexpress Inc) to deplete NK cells and limit rejection of donor bone marrow cells lacking MHC I expression (7). Restricting non- $\mu$ MT bone marrow cells to 20% of transferred donor bone marrow allowed reconstitution of all B cells from these cells while limiting reconstitution of non-B cell hematopoietic lineages such as T cells and DCs from these donors to  $\leq 20\%$  of the specific population as confirmed by FACS analyses at  $\geq 8$  weeks after reconstitution (Supplemental Figure 3A).

Heterotopic heart transplantation and costimulation blockade: Heart grafts were transplanted heterotopically in the abdomen of the recipient as previously described (8). Recipients of BALB/c heart allografts were treated with CTLA4Ig and anti-CD40L (MR1) (Bioexpress Inc), 0.25mg each, on days 2, 4, 6, and 8 after transplantation to prevent T cell activation by blocking costimulation and inhibit acute rejection (9). As established previously, recipients treated with costimulation blockade maintained palpable allograft heartbeat and contraction for >100 days of monitoring (9). Untreated recipients of Bm12 heart allografts develop chronic allograft rejection (2, 10) and were harvested between 90 – 100 days after transplantation (MST > 90 days in all groups,  $P > 0.05$ , NS). Logrank test (Graphpad Prism 5.0, Graphpad Software, Inc) was used to assess differences in allograft survival and  $P$  value of < 0.05 was considered significant.

Histological analyses and immunofluorescence staining: Transplanted hearts were harvested between 90 – 110 days. Grafts were sectioned transversely. Fixed, paraffin-embedded tissue sections of the base of the heart were stained with H&E and Verhoeff Van Gieson (VVG) for elastin fibers. Images of coronary arteries stained with VVG were analyzed by morphometry using ImageJ software for quantitation of obliterative vasculopathy. Intima was identified as lined by Internal Elastic Lamina (IEL). IEL and lumen were traced in each vessel and luminal occlusion (%) was calculated as  $(\text{IEL area} - \text{luminal area}) / \text{IEL area} \times 100$  (8). Vessels with any luminal occlusion were included to quantify percentage of vessels involved in each recipient and percentage of luminal occlusion in each vessel. Immunofluorescence studies were done on 6-8 $\mu\text{m}$  frozen sections of heart allograft and spleen tissues harvested from recipients between 90 – 110 days after transplantation. All antibodies were purchased from ebioscience and BD pharmingen except where indicated. Spleen cryosections were stained with biotinylated anti-MOMA-1 (ab51814, Abcam) for marginal zone metallophilic macrophages, anti-B220 (RA3-6B2) for B cells, anti-CD4 (RM4-5) for CD4 T cells and anti-CR1/2 (7E9) for follicular dendritic cells. Streptavidin conjugated Alexafluor-488, Alexafluor-555 and/or Alexafluor-647 (Invitrogen) were used as secondary antibodies. Heart allograft cryosections were stained with biotinylated anti-CD4 and anti-CD8 $\alpha$  (53-6.7) or anti-mouse IgG and anti-mouse C3 (11H9; Abcam) followed by streptavidin conjugated Alexafluor-488 and Alexafluor-555 secondary antibodies. 11H9 antibody used for detecting C3 reacts with mouse C3, C3b, iC3b and C3d. All sections were stained with DAPI, sealed under vectashield mounting media (Vector Labs) and imaged using Nikon Eclipse 800 microscope.

B cell transfer, flow cytometry, intracellular cytokine staining and detection of alloantibodies: B cells were isolated from spleens of naïve AID/ $\mu$ S KO mice by labeling with biotinylated antibodies against CD3, CD11b, CD11c and NK1.1 (BD Pharmingen and eBioscience) followed by streptavidin MACS beads (Miltenyi Biotec) and magnetic depletion of non-B cells (11).  $2 \times 10^7$  B cells ( $90 \pm 3\%$  purity) were adoptively transferred into  $\mu$ MT recipients where indicated 2 - 4 days prior to heart transplantation. Cells were harvested from spleen (SP), lymph node (LN), and bone marrow (BM) of transplant recipients at the time of graft harvest between 90 – 110 days after transplantation. BM cells were obtained from femurs and tibia, and multiplied by a factor of 5.4 to estimate total body BM cells (12, 13). Harvested cells were stained with fluorochrome-tagged antibodies to CD8 $\alpha$  (53-6.7), CD4 (RM4-5), CD44 (IM7), CD62L (MEL-14), CD69 (H1.2 F3), IFN $\gamma$  (XMG1.2) and TNF $\alpha$  (MP6-XT22) from BD Pharmingen and eBioscience for FACS. Intracellular IFN $\gamma$  and TNF $\alpha$  in T cells were measured after stimulation with BALB/c splenocytes (H-2<sup>d</sup>) (1:1) for 6hr or 24hr as indicated. Naïve WT, AID/ $\mu$ S KO and  $\mu$ MT mice showed intracellular IFN $\gamma$  and TNF $\alpha$  in CD4 T cells (0.13%, 0.11%, 0.14% and 0.14%, 0.16%, 0.18%, respectively) and CD8 T cells (0.08%, 0.06%, 0.07% and 0.09, 0.11 and 0.13%, respectively) that were not significantly different, and are not depicted separately. Flow cytometry acquisition was performed on LSRII analyzer (BD Biosciences), and data were analyzed using Flowjo software (Treestar). BALB/c-reactive alloantibodies were detected in the serum of allograft recipients at the time of graft harvest by flow cytometry using BALB/c thymocytes as target cells (14).

## 2. Supplemental Figures

**Supplemental Figure 1.** Histological analyses of heart allografts.

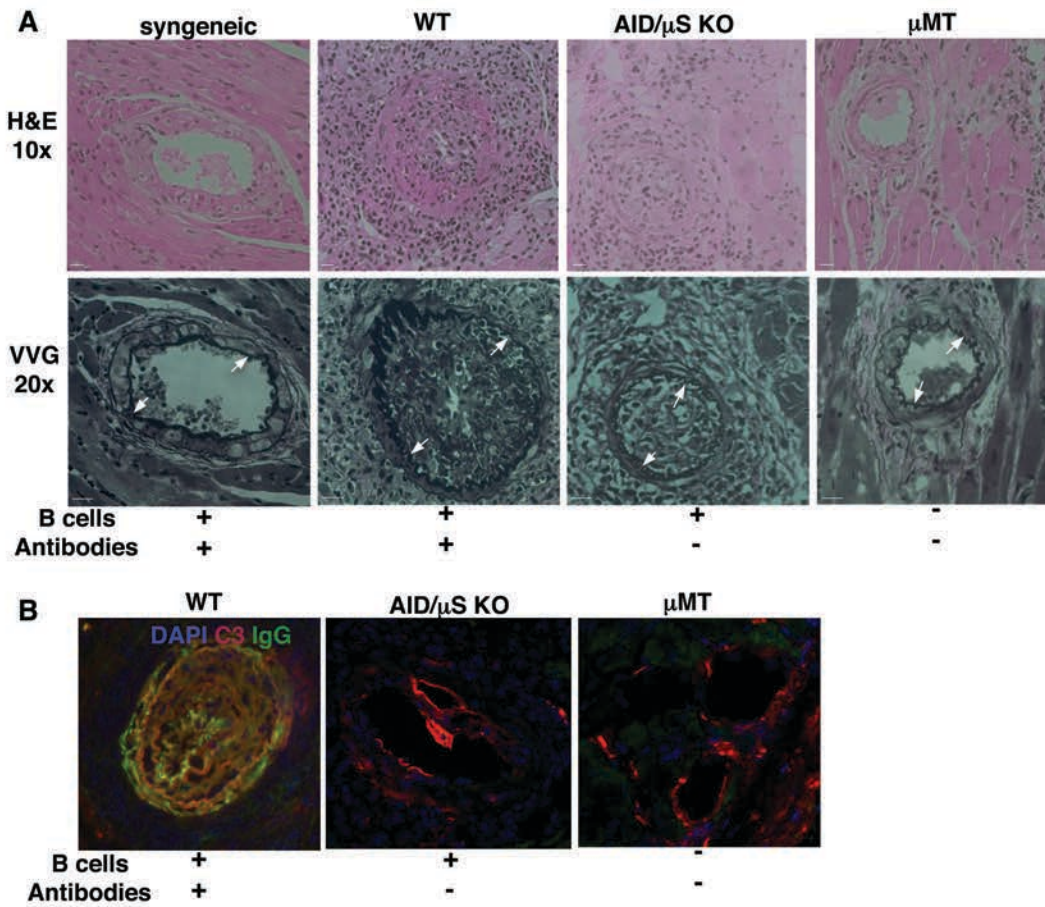

WT, AID/ $\mu$ S KO and  $\mu$ MT recipients were transplanted with BALB/c hearts and treated with costimulation blockade (CTLA4Ig and anti-CD40L, 0.25mg each, on days 2, 4, 6, and 8 after transplantation). Allografts were harvested at 100 – 110 days after transplantation. **(A)** Representative images of heart allograft sections (arrows point to internal elastic lamina, scale bar: 150 $\mu$ m). **(B)** Representative images of IgG and C3 staining in heart allograft cryosections (20x, blue for DAPI, red for C3 and green for IgG).

**Supplemental Figure 2.** Splenic lymphoid architecture in allograft recipients.

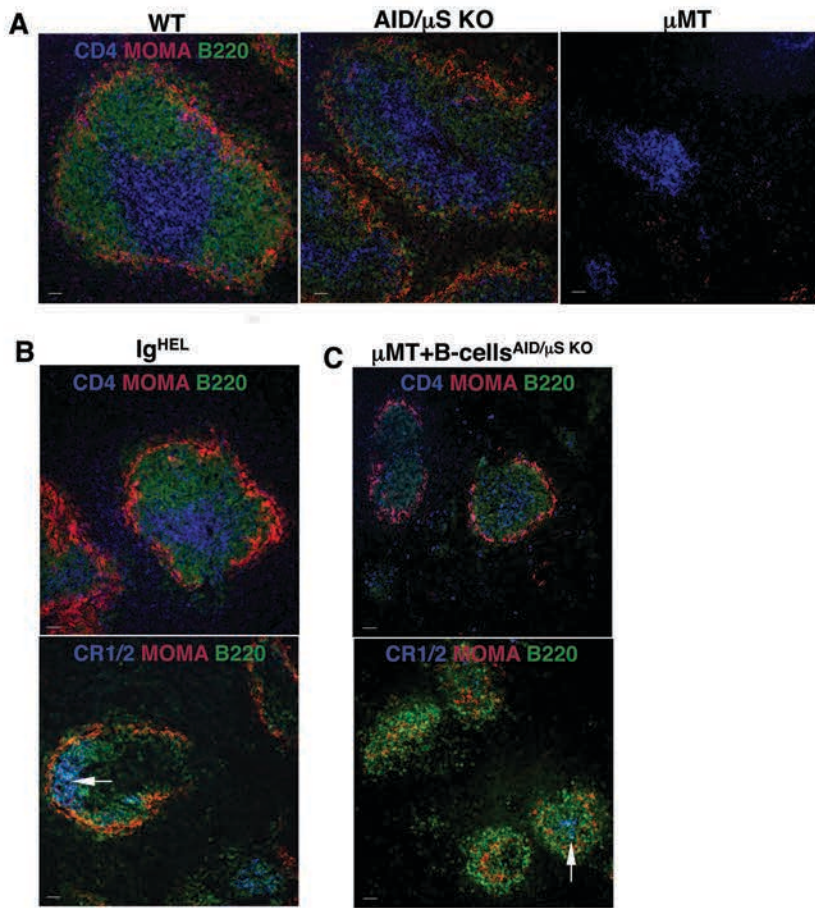

WT, AID/ $\mu$ S KO,  $\mu$ MT,  $Ig^{HEL}$  and  $\mu$ MT+B $^{AID/\mu S KO}$  recipients were transplanted with BALB/c hearts and treated with costimulation blockade (CTLA4Ig and anti-CD40L, 0.25mg each, on days 2, 4, 6 and 8 after transplantation).  $\mu$ MT+B $^{AID/\mu S KO}$  recipients were  $\mu$ MT mice that received naïve AID/ $\mu$ S KO B cells ( $2 \times 10^7$ , 2 - 4 days before transplantation). Mice were harvested between 90 – 110 days after transplantation. (A) Representative images of spleen cryosections from recipients stained for CD4 (blue), MOMA-1 (red) and B220 (green) are shown (10x, scale bar 150 $\mu$ m). (B - C) Representative images of spleen cryosections from  $Ig^{HEL}$  (B) and  $\mu$ MT+B-cell $^{AID/\mu S KO}$  (C) recipients showing CD4 (blue), MOMA-1 (red), B220 (green) in top panels and CR1/2 (blue), MOMA-1 (red), B220 (green) in bottom panels (arrow points to CR1/2 $^{+}$  follicular dendritic cell areas) (10x, scale bar 150 $\mu$ m).

**Supplemental Figure 3.** MHC expression and splenic lymphoid architecture in bone marrow chimeras.

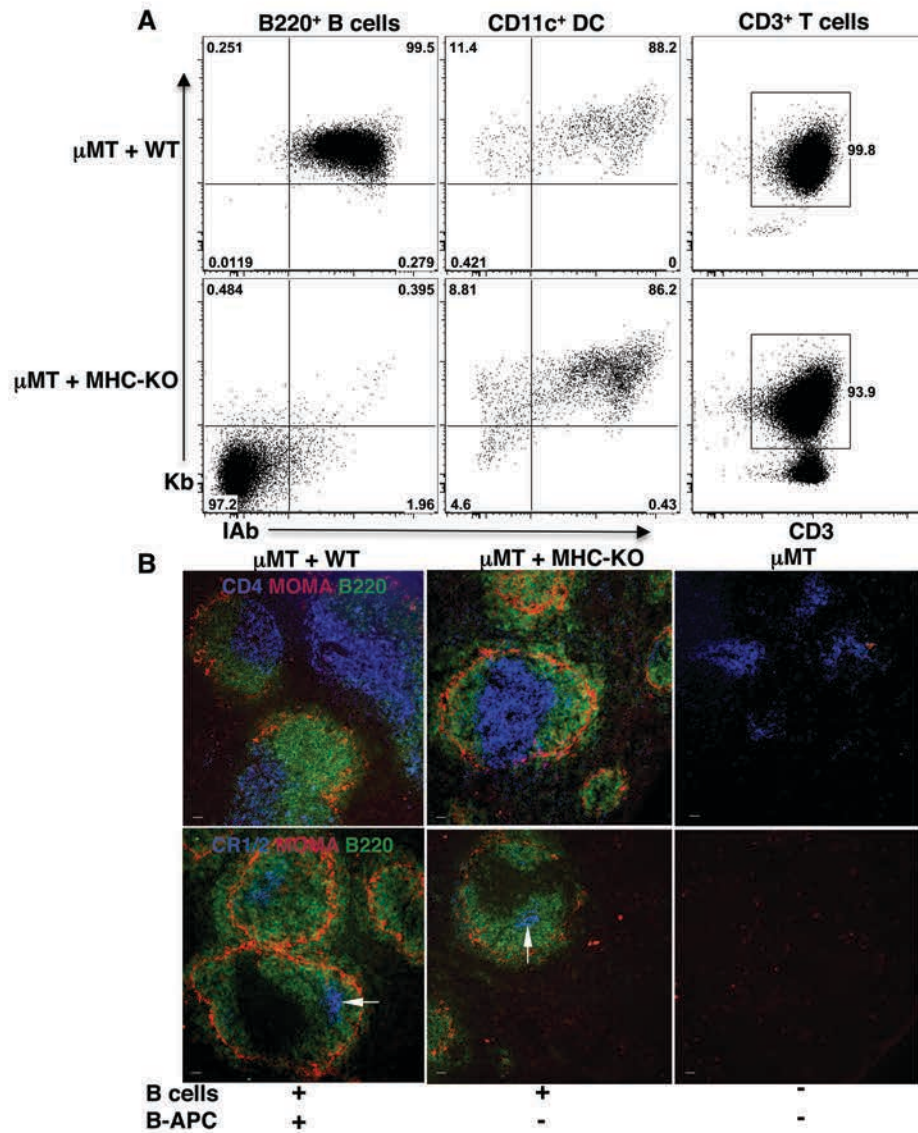

$\mu$ MT mice were lethally irradiated and reconstituted with bone marrow cells from  $\mu$ MT and WT ( $10^7$ , 80:20,  $\mu$ MT+WT $\rightarrow$  $\mu$ MT,  $\mu$ MT+WT) or  $\mu$ MT and MHC I & II deficient, *H2-Ab1<sup>-1</sup>-xb2m<sup>-1</sup>* ( $10^7$ , 80:20,  $\mu$ MT+MHC-KO $\rightarrow$  $\mu$ MT,  $\mu$ MT+MHC-KO) bone marrow cells. At 8 – 12 weeks after reconstitution, chimeras were transplanted with BALB/c heart allografts, treated with costimulation blockade (CTLA4Ig and anti-CD40L) and harvested between 90 – 100 days after transplantation. **(A)** Representative FACS plots of spleen cells from  $\mu$ MT+WT and  $\mu$ MT+MHC-KO chimeras are shown for Kb (MHC I) and IAb (MHC II) expression on B220<sup>+</sup> B cells ( $99 \pm 0.5\%$  and  $99 \pm 0.3\%$  vs.  $0.5 \pm 0.6\%$  and  $1.5 \pm 0.5\%$ , respectively) and CD11c<sup>+</sup> DCs ( $99 \pm 0.5\%$  and  $88 \pm 2\%$  vs.  $95 \pm 4\%$  and  $85 \pm 3\%$ , respectively) cells, and Kb expression on CD3<sup>+</sup> T cells ( $99 \pm 0.8\%$  vs.  $90 \pm 4\%$ , respectively). **(B)** Representative images of spleen cryosections from chimeras showing CD4 (blue), MOMA-1 (red), B220 (green) in top panels and CR1/2 (blue), MOMA-1 (red), B220 (green) in bottom panels (arrow points to CR1/2<sup>+</sup> follicular dendritic cell areas) (10x, scale bar 150 $\mu$ m).

**Supplemental Figure 4.** Heart allograft infiltrates in chimera recipients.

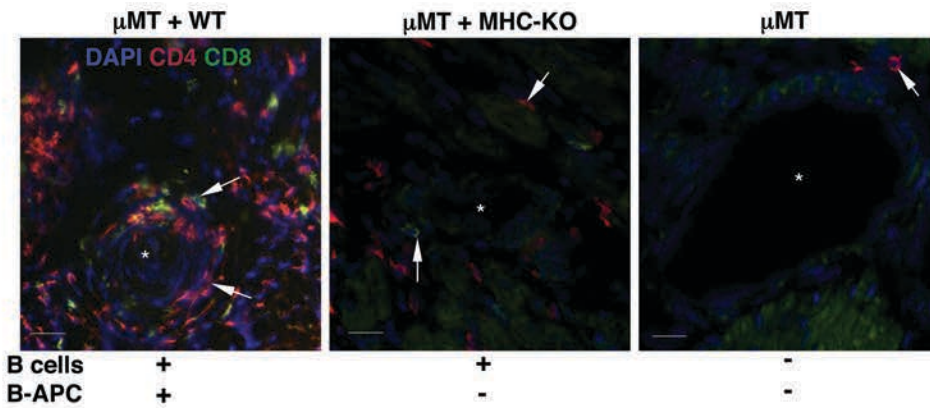

$\mu$ MT mice were lethally irradiated and reconstituted with bone marrow cells from  $\mu$ MT and WT ( $10^7$ , 80:20,  $\mu$ MT+WT $\rightarrow\mu$ MT,  $\mu$ MT+WT) or  $\mu$ MT and MHC I & II deficient, *H2-Ab1<sup>-/-</sup>xb2m<sup>-/-</sup>* ( $10^7$ , 80:20,  $\mu$ MT+MHC-KO $\rightarrow\mu$ MT,  $\mu$ MT+MHC-KO) bone marrow cells. At 8 – 12 weeks after reconstitution, chimeras were transplanted with BALB/c heart allografts, treated with costimulation blockade (CTLA4Ig and anti-CD40L) and harvested between 90 – 100 days after transplantation. Representative images of CD4 (red), CD8 (green) and DAPI (blue) in heart allograft cryosections from chimeras (20x, scale bar: 150 $\mu$ m, arrows point to CD4<sup>+</sup> or CD8<sup>+</sup> T cells).

### 3. Supplemental References

1. Kitamura, D., Roes, J., Kuhn, R., and Rajewsky, K. 1991. A B cell-deficient mouse by targeted disruption of the membrane exon of the immunoglobulin  $\mu$  chain gene. *Nature* 350:423-426.
2. Sayegh, M.H., Wu, Z., Hancock, W.W., Langmuir, P.B., Mata, M., Sandner, S., Kishimoto, K., Sho, M., Palmer, E., Mitchell, R.N., et al. 2003. Allograft rejection in a new allospecific CD4<sup>+</sup> TCR transgenic mouse. *Am J Transplant* 3:381-389.
3. Hansen, T.H., Melvold, R.W., Arn, J.S., and Sachs, D.H. 1980. Evidence for mutation in an I-A gene. *Nature* 285:340-341.
4. Goodnow, C.C., Crosbie, J., Adelstein, S., Lavoie, T.B., Smith-Gill, S.J., Brink, R.A., Pritchard-Briscoe, H., Wotherspoon, J.S., Loblay, R.H., Raphael, K., et al. 1988. Altered immunoglobulin expression and functional silencing of self-reactive B lymphocytes in transgenic mice. *Nature* 334:676-682.
5. Kumazaki, K., Tirosh, B., Maehr, R., Boes, M., Honjo, T., and Ploegh, H. 2007. AID<sup>-/-</sup>ms<sup>-/-</sup> mice are agammaglobulinemic and fail to maintain B220-CD138<sup>+</sup> plasma cells. *J Immunol* 178:2192-2203.
6. Wojciechowski, W., Harris, D.P., Sprague, F., Mousseau, B., Makris, M., Kusser, K., Honjo, T., Mohrs, K., Mohrs, M., Randall, T., et al. 2009. Cytokine-producing effector B cells regulate type 2 immunity to *H. polygyrus*. *Immunity* 30:421-433.
7. Bix, M., Liao, N.-S., Zijlstra, M., Loring, J., Jaenisch, R., and Raulet, D. 1991. Rejection of class I MHC-deficient hematopoietic cells by irradiated MHC-mismatched mice. *Nature* 349:329-331.
8. Hasegawa, T., Visovatti, S.H., Hyman, M.C., Hayasaki, T., and Pinsky, D.J. 2007. Heterotopic vascularized murine cardiac transplantation to study graft arteriopathy. *Nat Protoc* 2:471-480.
9. Chalasani, G., Li, Q., Konieczny, B.T., Smith-Diggs, L., Wrobel, B., Dai, Z., Perkins, D.L., Baddoura, F.K., and Lakkis, F.G. 2004. The allograft defines the type of rejection (acute versus chronic) in the face of an established effector immune response. *J Immunol* 172:7813-7820.
10. Win, T.S., Rehakova, S., Negus, M.C., Saeb-Parsy, K., Goddard, M., Conlon, T.M., Bolton, E.M., Bradley, J.A., and Pettigrew, G.J. 2009. Donor CD4 T cells contribute to cardiac allograft vasculopathy by providing help for autoantibody production. *Circ Heart Fail* 2:361-369.
11. Ng, Y., Oberbarnscheidt, M., Chandramoorthy, H., Hoffman, R., and Chalasani, G. 2010. B cells help alloreactive T cells differentiate into memory T cells *Am J Transplant* 10:1970-1980.



12. Chervenick, P.A., Boggs, D.R., Marsh, J.C., Cartwright, G.E., and Wintrobe, M.M. 1968. Quantitative studies of blood and bone marrow neutrophils in normal mice. *Am J Physiol* 215:353-360.
13. Obhrai, J., Oberbarnscheidt, M., Hand, T., Diggs, L., Chalasani, G., and Lakkis, F. 2006. Effector T cell differentiation and memory T cell maintenance outside secondary lymphoid organs. *J Immunol* 176:4051-4058.
14. Amano, H., Bickerstaff, A., Orosz, C.G., Novick, A.C., Toma, H., and Fairchild, R.L. 2005. Absence of recipient CCR5 promotes early and increased allospecific antibody responses to cardiac allografts. *J Immunol* 174:6499-6508.
